# Supplementary material for: Development and Performance Assessment of a Novel Plasma p-Tau181 Assay Reflecting Tau Tangle Pathology in Alzheimer’s Disease
Source: bioRxiv or medRxiv preprint supplement (doi:10.1101/2023.09.15.23295595), 2023-11-20

# Supplementary Figure 1

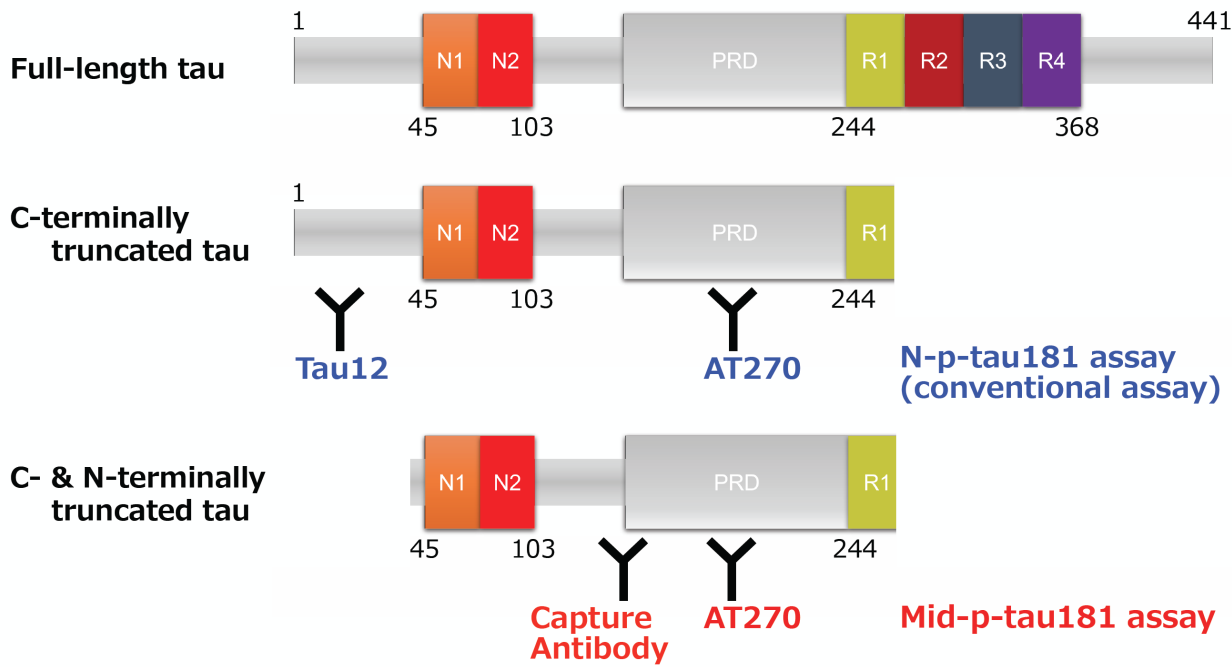

# Supplementary Figure 2

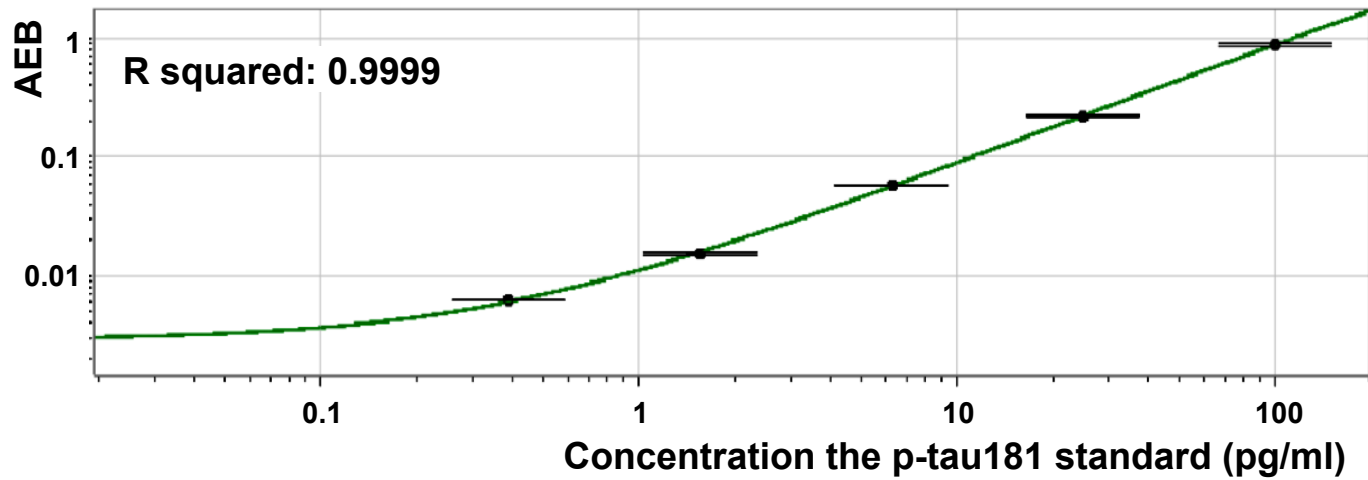

**Supplementary Figure 3**

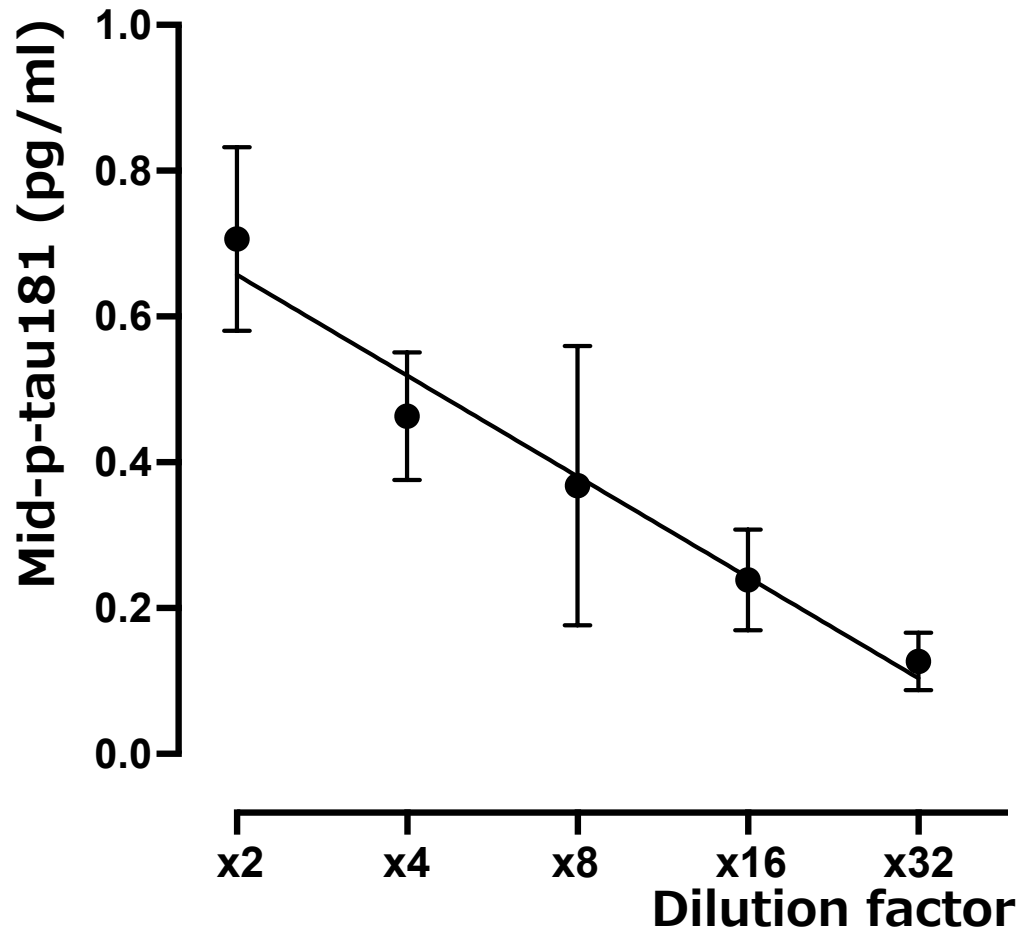

# Supplementary Figure 4

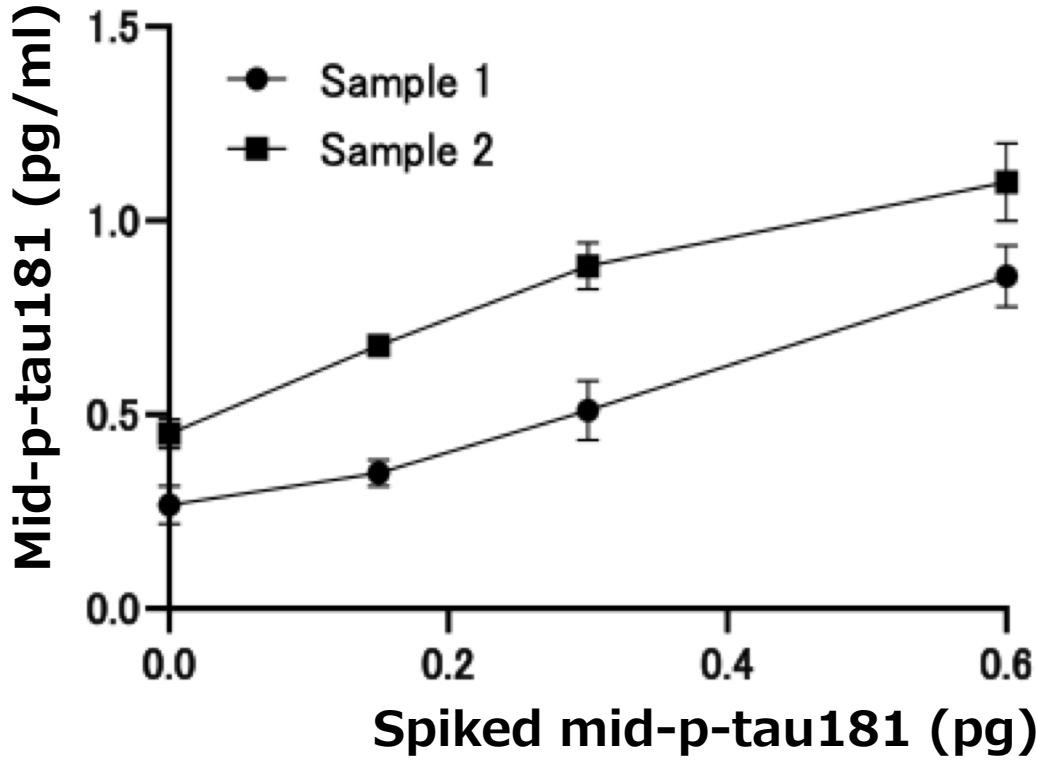

# Supplementary Figure 5

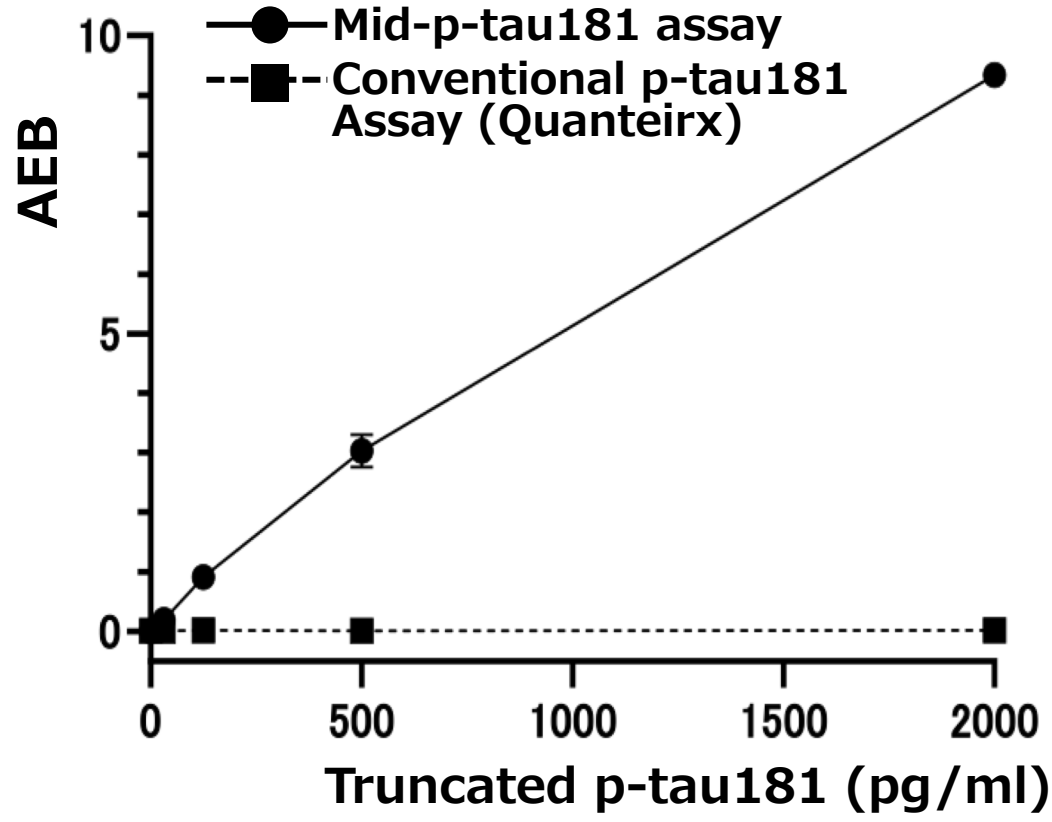

# Supplementary Figure 6

Braak staging ROI

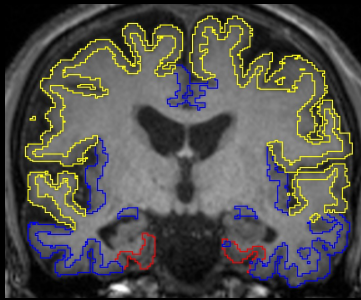

Temporal meta ROI

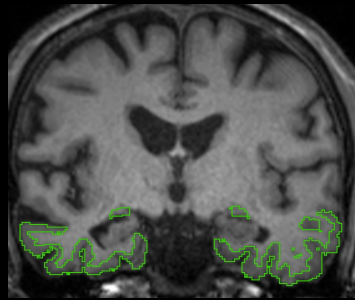

AD tau score ROI

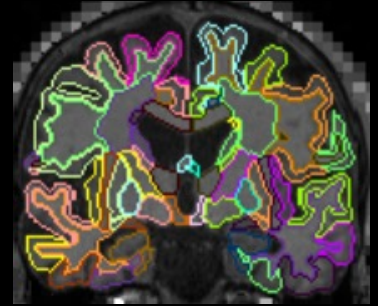

# Supplementary Figure 7

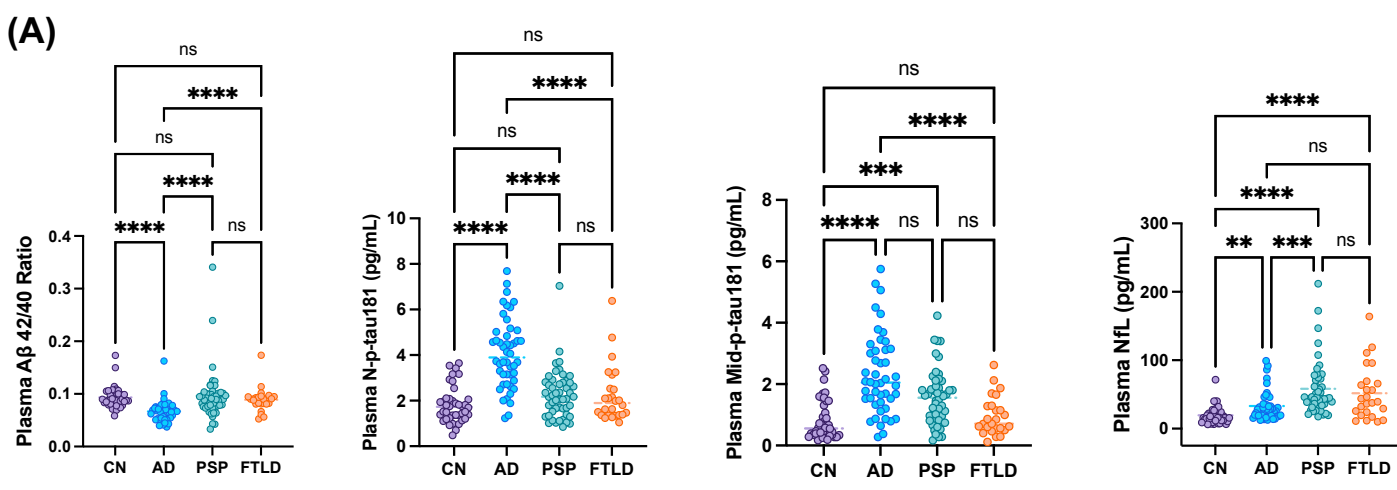

**(B) Amyloid (+) vs Amyloid (-)**

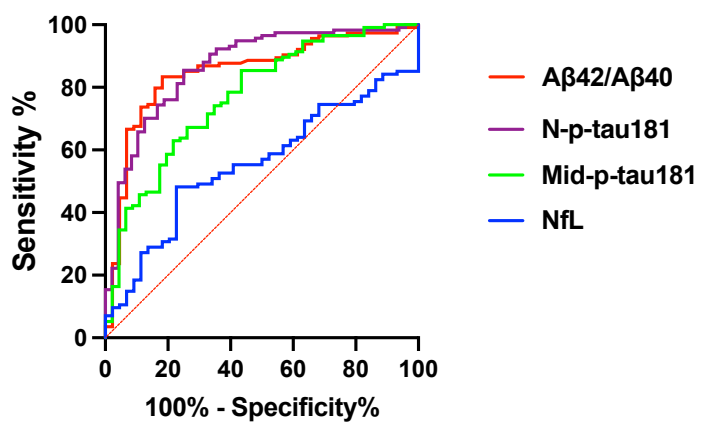

|              | AUC values |
|--------------|------------|
| Aβ42/40      | 0.714      |
| N-p-tau181   | 0.905      |
| Mid-p-tau181 | 0.844      |
| NfL          | 0.641      |

# Supplementary Figure 8

## Tau PET vs Plasma Mid-p-tau181

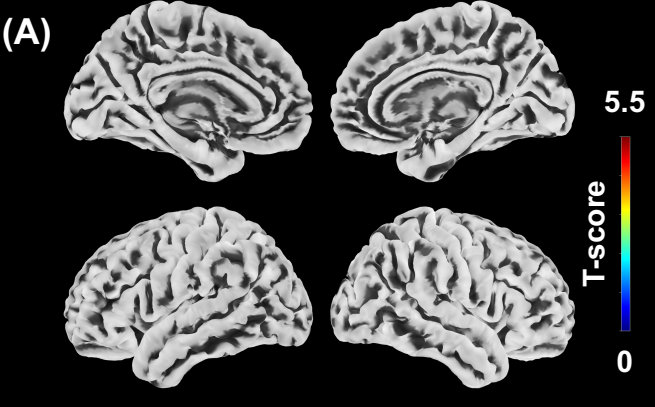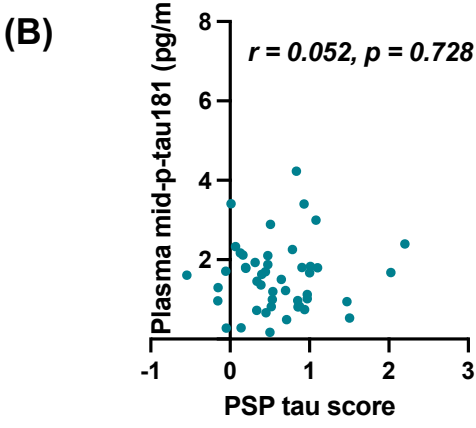

(C)

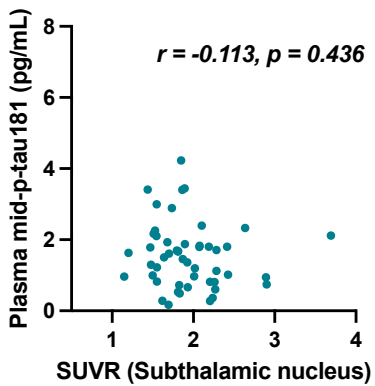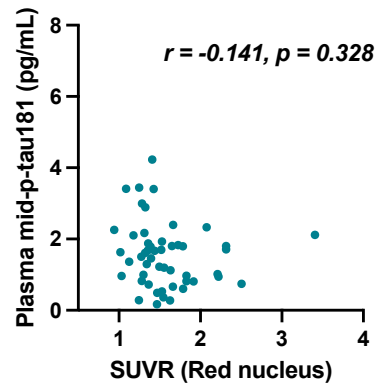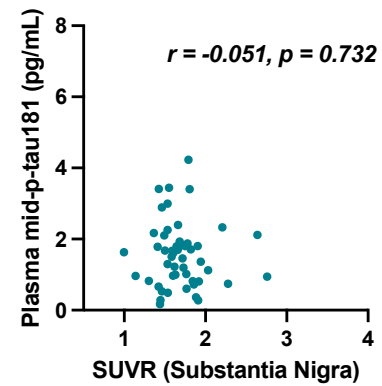

Supplement: Supplementary file [file media-2.pdf]
